# Supplementary material for: Deriving paired Fe sites on N-doped carbon from Fe(iii)-tetrapyridinylporphyrin-modified ZIF-8: robust electrocatalysts for air electrodes in zinc–air batteries
Source: Royal Society of Chemistry journal article supplement (doi:10.1039/d3qi02524a), 2024-01-01
Supplement: d3qi02524a1.pdf [file d3qi02524a1.pdf]

**Supporting Information for**

**Deriving Paired Fe Sites on N-Doped Carbon from Fe(III)-  
Tetrapyridinylporphyrin-Modified ZIF-8: Robust Electrocatalysts for Air  
Electrodes in Zinc-Air Batteries**

Guiyuan Yang,<sup>a</sup> Fangyuan Hu,<sup>a</sup> Li-Li Cui,<sup>a</sup> Meihong Fan,<sup>a</sup> Xin Ge,<sup>b</sup> Xingquan He<sup>\*,a</sup> Wei  
Zhang<sup>\*,b</sup> Tewodros Asefa<sup>\*,c</sup>

<sup>a</sup> School of Chemistry and Environmental Engineering, Changchun University of  
Science and Technology; 7089 Weixing Road, Changchun 130022, P. R. China

<sup>b</sup> Key Laboratory of Automobile Materials MOE, School of Materials Science &  
Engineering, Jilin Provincial International Cooperation Key Laboratory of High-  
Efficiency Clean Energy Materials, and Electron Microscopy Center, and International  
Center of Future Science, Jilin University, 2699 Qianjin Street, Changchun 130012, P.  
R. China

<sup>c</sup> Department of Chemistry and Chemical Biology & Department of Chemical and  
Biochemical Engineering, Rutgers, The State University of New Jersey, 610 Taylor  
Road, Piscataway, New Jersey 08854, USA

\* Corresponding authors' e-mails: hexingquan@hotmail.com (X. He);  
weizhang@jlu.edu.cn (W. Zhang); tasefa@chem.rutgers.edu (T. Asefa)

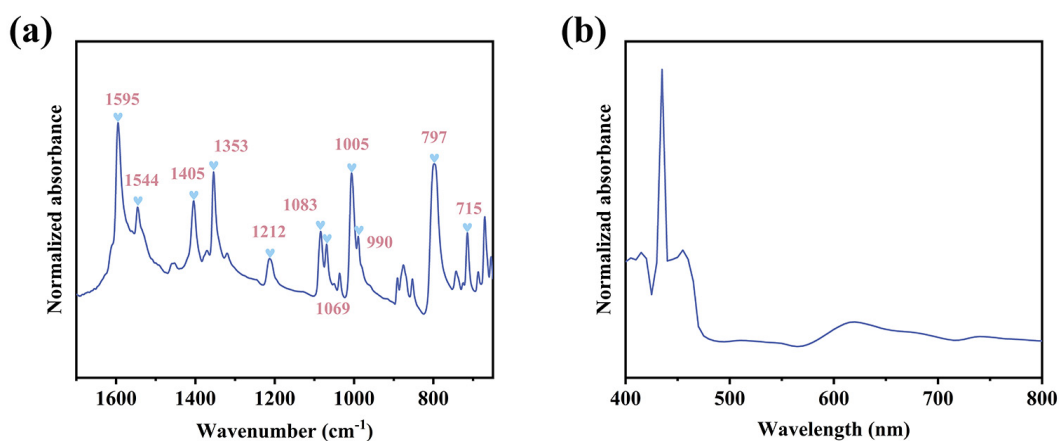

**Figure S1.** (a) Attenuated total reflectance Fourier-transform infrared (FTIR) spectrum of powder FeTPyP and (b) UV-Vis absorption spectrum of FeTPyP dissolved in *N,N*-dimethylformamide. The FT-IR spectrum of FeTPyP exhibits typical vibration peaks attributable to the Fe(III)-modified 5,10,15,20-tetrakis(4-pyridyl)porphyrin, and the UV-Vis spectrum of FeTPyP shows the typical absorption peaks of the Fe(III)-modified 5,10,15,20-tetrakis(4-pyridyl)porphyrin at 435 nm (a B band) and 620 nm (a Q band), as reported previously.<sup>1</sup>

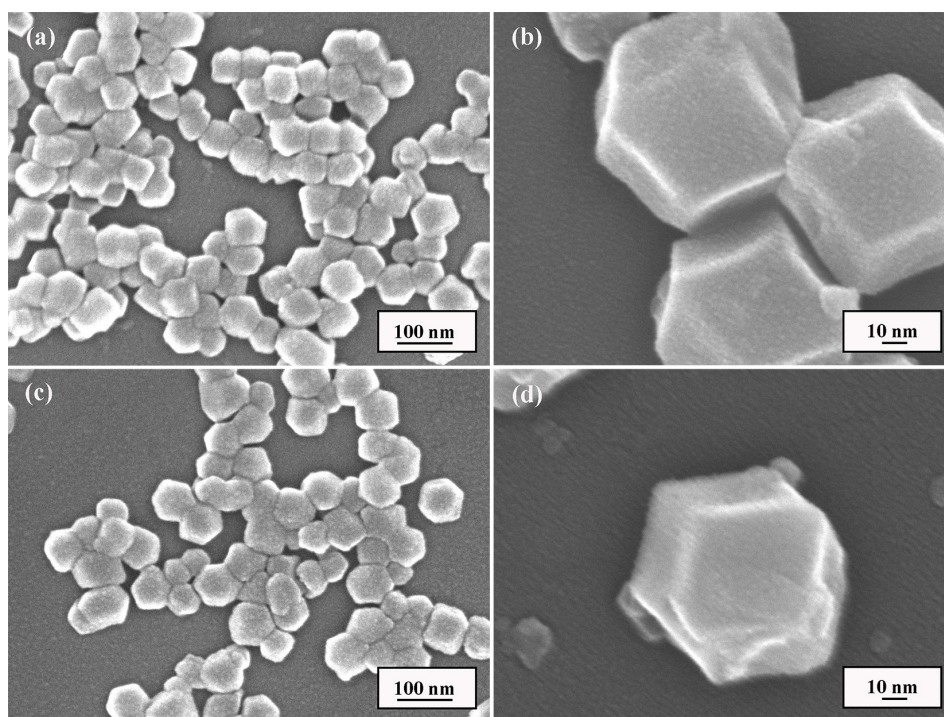

**Figure S2.** SEM images of (a,b) ZIF-8 and (c,d) ZIF-8/FeTPyP.

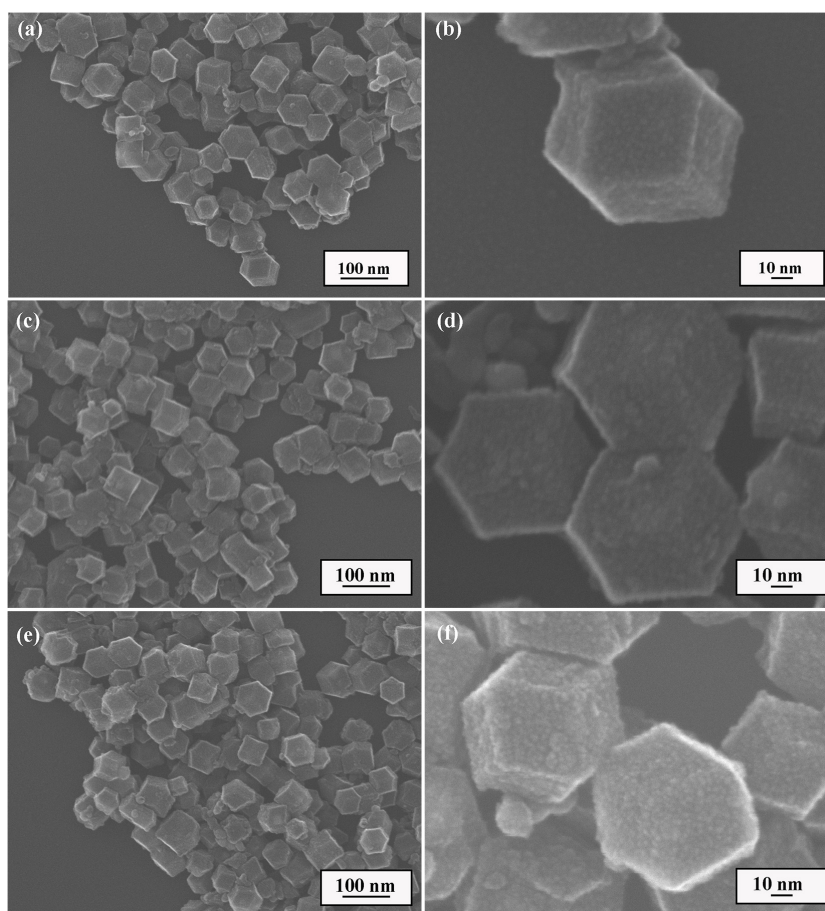

**Figure S3.** SEM images of (a,b) Fe<sub>2</sub>-N-C-900, (c,d) ZIF-8/FeTPP-900, and (e,f) N-C-900.

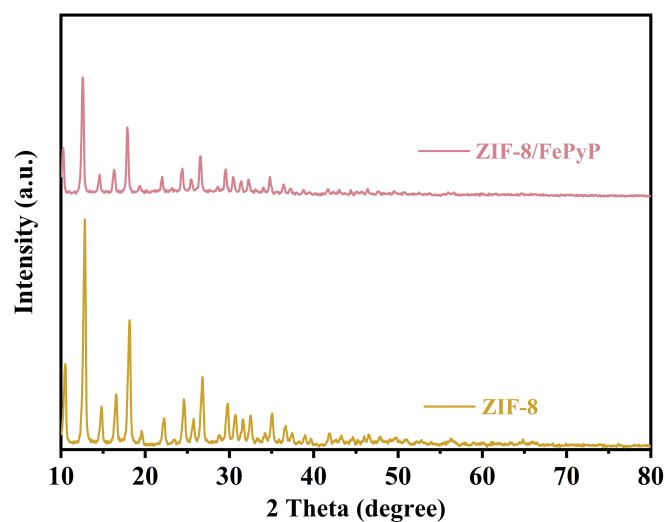

**Figure S4.** X-ray diffraction patterns of ZIF-8 and ZIF-8/FeTPP. The XRD patterns show that the modification of ZIF-8 with FeTPP results in no distinct change in the XRD pattern of ZIF-8. In other words, the modification of ZIF-8 with FeTPP does not change the crystal structure of ZIF-8.

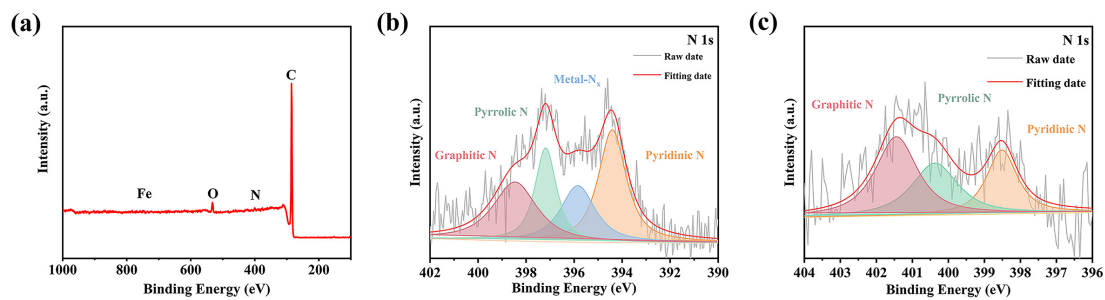

**Figure S5.** (a) XPS survey spectrum of Fe<sub>2</sub>-N-C-900 and (b,c) high-resolution XPS spectra of N 1s of ZIF-8/FeTPP-900 and N-C-900, respectively.

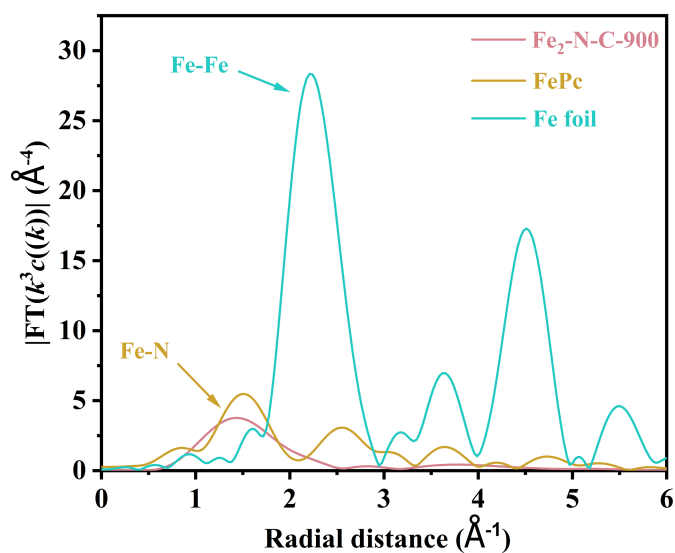

**Figure S6.** Fourier transform (FT) profiles of Fe K-edge EXAFS oscillations of planar-like Fe<sub>2</sub>N<sub>6</sub> structure. Those for Fe foil and FePc are also obtained and included for reference.

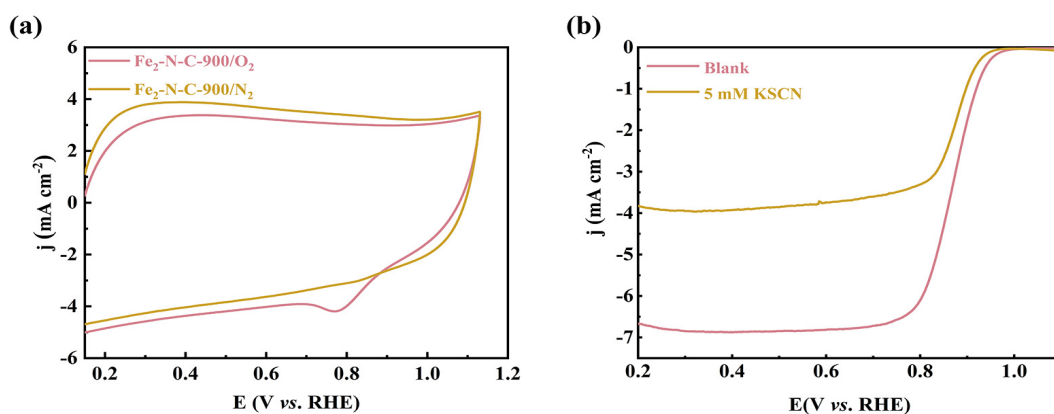

**Figure S7.** (a) CV curves of Fe<sub>2</sub>-N-C-900 and commercial Pt/C in O<sub>2</sub>- and N<sub>2</sub>-saturated alkaline electrolyte (0.1 M KOH) at 100 mV s<sup>-1</sup>. (b) LSV curves of Fe<sub>2</sub>-N-C-900 and Pt/C in O<sub>2</sub>-saturated KOH solution (0.1 M) before and after addition of KSCN into the solution, respectively.

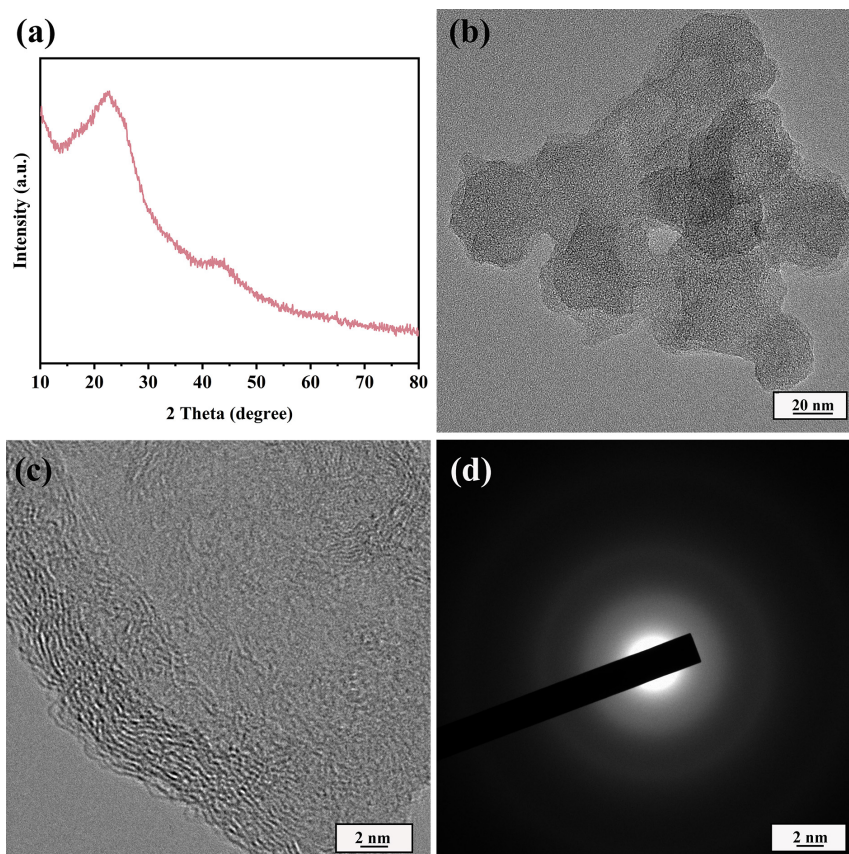

**Figure S8.** (a) The XRD pattern, (b) TEM image, (c) high resolution TEM image, and (d) SAED image of Fe<sub>2</sub>-N-C-900 after the stability test for ORR.

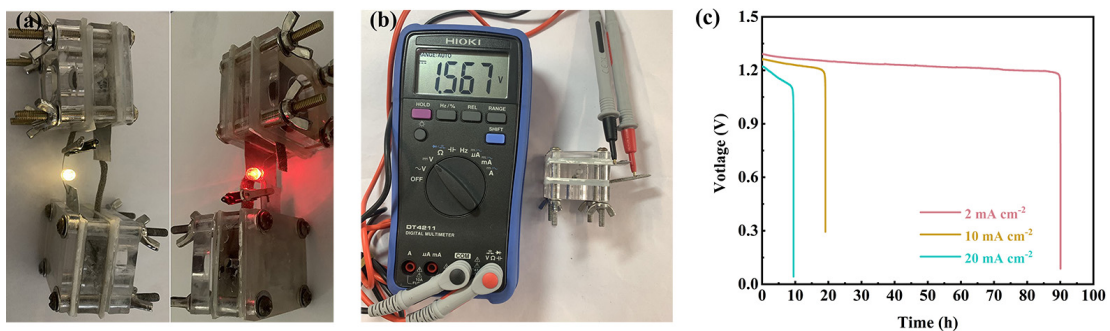

**Figure S9.** (a) LEDs powered by two Fe<sub>2</sub>-N-C-900-based ZABs connected in series are displayed. (b) Photographs of a ZAB displaying its measured open-circuit voltage of 1.567 V. (c) V Galvanostatic discharge voltage versus time curves of ZABs containing Fe<sub>2</sub>-N-C-900 as electrocatalyst at the cathode at current densities of 2, 10, and 20 mA cm<sup>-2</sup>.

**Table S1.** Comparison of the porosity of the different materials synthesized and studied.

| Materials/Catalysts      | SSA (m <sup>2</sup> g <sup>-1</sup> ) | Pore volume (cm <sup>3</sup> g <sup>-1</sup> ) |
|--------------------------|---------------------------------------|------------------------------------------------|
| Fe <sub>2</sub> -N-C-900 | 697                                   | 2.483                                          |
| ZIF-8/FeTPP-900          | 413                                   | 1.724                                          |
| N-C-900                  | 493                                   | 0.374                                          |

**Table S2.** Relative amounts of the elements present on the surfaces of the materials, as determined by XPS analysis.

| Materials/Catalysts      | Fe   | C     | N    | O    |
|--------------------------|------|-------|------|------|
| Fe <sub>2</sub> -N-C-900 | 0.53 | 90.7  | 5.06 | 3.31 |
| ZIF-8/FeTPP-900          | 0.57 | 90.07 | 3.55 | 5.2  |
| N-C-900                  | --   | 92.82 | 2.05 | 3.86 |

**Table S3.** The types and amounts of surface N species on the materials, as determined by XPS.

| Materials/Catalysts      | N (at. %) | Pyridinic N (at. %) | Metal-N (at. %) | Pyrrolic N (at. %) | Graphitic N (at. %) |
|--------------------------|-----------|---------------------|-----------------|--------------------|---------------------|
| Fe <sub>2</sub> -N-C-900 | 5.06      | 23.07               | 24.66           | 19.19              | 33.08               |
| ZIF-8/FeTPP-900          | 3.55      | 22.33               | 21.20           | 23.81              | 32.66               |
| N-C-900                  | 2.05      | 25.53               | --              | 31.10              | 43.37               |

**Table S4.** EXAFS fitting parameters at the Fe K-edge for various materials ( $S_0^2 = 0.719$ ).

| Materials                | Shell | CN <sup>a</sup> | R(Å) <sup>b</sup> | σ <sup>2</sup> (Å <sup>2</sup> ) <sup>c</sup> | ΔE <sub>0</sub> (eV) <sup>d</sup> | R factor |
|--------------------------|-------|-----------------|-------------------|-----------------------------------------------|-----------------------------------|----------|
| Fe foil                  | Fe-Fe | 8*              | 2.47±0.01         | 0.0042±0.0007                                 | 7.2                               | 0.0016   |
|                          | Fe-Fe | 6*              | 2.86±0.01         | 0.0055±0.0012                                 |                                   |          |
| FePc                     | Fe-N  | 3.8±0.7         | 2.00±0.01         | 0.0113±0.0021                                 | 6.2                               | 0.0086   |
|                          | Fe-C  | 6.0±1.1         | 3.00±0.01         | 0.0063±0.0014                                 |                                   |          |
| Fe <sub>2</sub> -N-C-900 | Fe-N  | 4.3±0.9         | 1.98±0.02         | 0.0101±0.0043                                 | 3.5                               | 0.0192   |

**Table S5.** Electrocatalytic activities for ORR over the different materials in 0.1 M KOH electrolyte.

| Materials/Catalysts      | $E_{\text{onset}}$ (V) | $E_{1/2}$ (V) | $j_L$ [ $\text{mA cm}^{-2}$ ] |
|--------------------------|------------------------|---------------|-------------------------------|
| Fe <sub>2</sub> -N-C-900 | 0.990                  | 0.869         | -6.67                         |
| ZIF-8/FeTPP-900          | 0.958                  | 0.851         | -5.33                         |
| N-C-900                  | 0.932                  | 0.805         | -5.18                         |
| Pt/C                     | 1.001                  | 0.850         | -5.65                         |

**Table S6.** Comparison of  $E_{\text{onset}}$  and  $E_{1/2}$  required by ORR in 0.1 M KOH solution over Fe-N-C-900 versus those of various non-noble metal catalysts recently reported in the literature.

| Materials/Catalysts                   | $E_{\text{onset}}$ (V) | $E_{1/2}$ (V) | Electrolytes     | References       |
|---------------------------------------|------------------------|---------------|------------------|------------------|
| FeN <sub>4</sub> SAs/NPC              | 0.972                  | 0.885         | 1 M KOH          | 2                |
| Fe/N-G-SAC                            | 0.988                  | 0.890         | 1 M KOH          | 3                |
| Fe-N-C HNSs                           | 1.06                   | 0.87          | 0.1 M KOH        | 4                |
| Fe-N-C/N-OMC                          | 1.08                   | 0.93          | 0.1 M KOH        | 5                |
| Fe-IICSAC                             | 1.01                   | 0.908         | 0.1 M KOH        | 6                |
| Fe-N/C-1/30                           | 1.04                   | 0.895         | 0.1 M KOH        | 7                |
| FeN <sub>2</sub> /NOMC                | 0.98                   | 0.89          | 0.1 M KOH        | 8                |
| FeN <sub>3</sub> OS                   | 1.01                   | 0.874         | 0.1 M KOH        | 9                |
| OAC                                   | 0.98                   | 0.854         | 0.1 M KOH        | 10               |
| FeNC-F3                               | 0.988                  | 0.858         | 0.1 M KOH        | 11               |
| L-FeNC                                | 0.99                   | 0.89          | 0.1 M KOH        | 12               |
| 3DOM Fe-N-C                           | 0.997                  | 0.875         | 0.1 M KOH        | 13               |
| Fe SAs/N-C                            | 1.01                   | 0.91          | 0.1 M KOH        | 14               |
| Fe-N-C/Rgo                            | 0.99                   | 0.90          | 0.1 M KOH        | 15               |
| Fe-SA/Micro-C                         | 1.05                   | 0.926         | 0.1 M KOH        | 16               |
| Fe-NCNWs                              | 1.02                   | 0.91          | 0.1 M KOH        | 17               |
| Fe/NSC <sup>N</sup> (1 <sup>N</sup> ) | 1.14                   | 0.87          | 0.1 M KOH        | 18               |
| meso-Fe-N-C                           | 0.998                  | 0.846         | 0.1 M KOH        | 19               |
| ISG Fe-N-C                            | 1.02                   | 0.91          | 0.1 M KOH        | 20               |
| Fe-N/GNs                              | 1.01                   | 0.903         | 0.1 M KOH        | 21               |
| <b>Fe<sub>2</sub>-N-C-900</b>         | <b>0.990</b>           | <b>0.869</b>  | <b>0.1 M KOH</b> | <b>This work</b> |



**Table S7.** The values of  $C_{dl}$  and  $R_{ct}$  of different catalysts obtained from the equivalent circuit model with electrochemical impedance spectroscopy (EIS).

| Materials/Catalysts      | $C_{dl}$ (mF cm <sup>-2</sup> ) | $R_{ct}$ ( $\Omega$ ) |
|--------------------------|---------------------------------|-----------------------|
| Fe <sub>2</sub> -N-C-900 | 14.52                           | 307                   |
| ZIF-8/FeTPP-900          | 10.19                           | 480                   |
| N-C-900                  | 7.88                            | 991                   |
| Pt/C                     | 13.49                           | 477                   |

**Table S8.** Comparison of the performances of ZAB assembled using the synthesized catalyst reported herein (Fe<sub>2</sub>-N-C-900) in this work as the air cathode with respect to ZABs containing other single-atom catalysts recently reported in the literature.

| Catalysts                     | Electrolyte    | OCV<br>(V)   | PPD<br>(mW cm <sup>-2</sup> ) | References       |
|-------------------------------|----------------|--------------|-------------------------------|------------------|
| Fe/NCNF                       | 6 M KOH        | 1.54         | 146                           | 22               |
| Fe <sub>1</sub> /NC           | 6 M KOH        | 1.45         | 164                           | 23               |
| 3D SAFe                       | 6 M KOH        | 1.47         | 156                           | 24               |
| ISG Fe-N-C                    | 6 M KOH        | 1.45         | 155                           | 20               |
| Fe-SASCs                      | 6 M KOH        | 1.47         | 78                            | 25               |
| FeSA/ N-PSCS                  | 6 M KOH        | 1.45         | 164.5                         | 26               |
| FePc-c-NG-10                  | 6 M KOH        | 1.45         | 141                           | 27               |
| 3DOM Fe-N-C-900               | 6 M KOH        | 1.47         | 175.9                         | 28               |
| Fe-SA/NCS                     | 6 M KOH        | 1.53         | 141.6                         | 29               |
| FeSA/NSC                      | 6 M KOH        | 1.501        | 159                           | 30               |
| CPANI-TA-Fe-SA-NC             | 6 M KOH        | 1.44         | 136                           | 31               |
| Fe-N-C                        | 6 M KOH        | 1.453        | 131                           | 32               |
| SAC-FeN-WPC                   | 6 M KOH        | 1.32         | 70.2                          | 33               |
| Fe/Z <sub>8</sub> -E-C        | 6 M KOH        | 1.58         | 157.8                         | 34               |
| Fe-N-C/RGO                    | 6 M KOH        | 1.52         | 107.12                        | 35               |
| Fe-N-C-700                    | 6 M KOH        | 1.425        | 70                            | 36               |
| Fe/N-G-800                    | 6 M KOH        | 1.56         | 136                           | 37               |
| <b>Fe<sub>2</sub>-N-C-900</b> | <b>6 M KOH</b> | <b>1.567</b> | <b>166.3</b>                  | <b>This work</b> |

## References

- 1 K. Tomita, N. Shioya, T. Shimoaka, M. Wakioka and T. Hasegawa, Control of supramolecular organizations by coordination bonding in tetrapyrrolylporphyrin thin films, *Chem. Comm.*, 2022, **58**, 2116-2119.
- 2 J. C. Li, Y. Meng, R. Ma, H. Hu, S. Zhao, Y. Zhu, P. X. Hou and C. Liu, Ionothermal-Transformation Strategy to Synthesize Hierarchically Tubular Porous Single-Iron-Atom Catalysts for High-Performance Zinc-Air Batteries, *ACS Appl Mater Interfaces*, 2021, **13**, 58576-58584.
- 3 M. Xiao, Z. Xing, Z. Jin, C. Liu, J. Ge, J. Zhu, Y. Wang, X. Zhao and Z. Chen, Preferentially engineering FeN(4) edge sites onto graphitic nanosheets for highly active and durable oxygen electrocatalysis in rechargeable Zn-Air batteries, *Adv. Mater.*, 2020, **32**, e2004900.
- 4 Y. Chen, Z. Li, Y. Zhu, D. Sun, X. Liu, L. Xu and Y. Tang, Atomic Fe Dispersed on N-Doped Carbon Hollow Nanospheres for High-Efficiency Electrocatalytic Oxygen Reduction, *Adv Mater*, 2019, **31**, e1806312.
- 5 J. Han, H. Bao, J.-Q. Wang, L. Zheng, S. Sun, Z. L. Wang and C. Sun, 3D N-doped ordered mesoporous carbon supported single-atom Fe-N-C catalysts with superior performance for oxygen reduction reaction and zinc-air battery, *Appl. Catal. B*, 2021, **280**, 119411.
- 6 S. Ding, Z. Lyu, H. Zhong, D. Liu, E. Sarnello, L. Fang, M. Xu, M. H. Engelhard, H. Tian, T. Li, X. Pan, S. P. Beckman, S. Feng, D. Du, J. C. Li, M. Shao and Y. Lin, An Ion-Imprinting Derived Strategy to Synthesize Single-Atom Iron Electrocatalysts for Oxygen Reduction, *Small*, 2021, **17**, e2004454.
- 7 W. Wei, X. Shi, P. Gao, S. Wang, W. Hu, X. Zhao, Y. Ni, X. Xu, Y. Xu, W. Yan, H. Ji and M. Cao, Well-elaborated, mechanochemically synthesized Fe-TPP@ZIF precursors (Fe-TPP=tetraphenylporphine iron) to atomically dispersed iron-nitrogen species for oxygen reduction reaction and Zn-air batteries, *Nano Energy*, 2018, **52**, 29-37.
- 8 H. Shen, E. Gracia-Espino, J. Ma, H. Tang, X. Mamat, T. Wagberg, G. Hu and S. Guo, Atomically FeN<sub>2</sub> moieties dispersed on mesoporous carbon: A new atomic catalyst for efficient oxygen reduction catalysis, *Nano Energy*, 2017, **35**, 9-16.
- 9 L. Yu, Y. Li and Y. Ruan, Dynamic control of sacrificial bond transformation in the Fe-N-C single-atom catalyst for molecular oxygen reduction, *Angew. Chem. Int. Ed.*, 2021, **60**, 25296-25301.
- 10 L. Deng, L. Qiu, R. Hu, L. Yao, Z. Zheng, X. Ren, Y. Li and C. He, Restricted diffusion preparation of fully-exposed Fe single-atom catalyst on carbon nanospheres for efficient oxygen reduction reaction, *Appl. Catal. B*, 2022, **305**, 121058.
- 11 C. Shao, L. Wu, Y. Wang, K. Qu, H. Chu, L. Sun, J. Ye, B. Li and X. Wang, An open superstructure of hydrangea-like carbon with highly accessible Fe-N<sub>4</sub> active sites for enhanced oxygen reduction reaction, *Chem. Eng. J.*, 2022, **429**, 132307.
- 12 X. Jiang, J. Chen, F. Lyu, C. Cheng, Q. Zhong, X. Wang, A. Mahsud, L. Zhang and Q.

- Zhang, In situ surface-confined fabrication of single atomic Fe-N<sub>4</sub> on N-doped carbon nanoleaves for oxygen reduction reaction, *J. Energy Chem.*, 2021, **59**, 482-491.
- 13 F. Xiao, G.-L. Xu, C.-J. Sun, M. Xu, W. Wen, Q. Wang, M. Gu, S. Zhu, Y. Li, Z. Wei, X. Pan, J. Wang, K. Amine and M. Shao, Nitrogen-coordinated single iron atom catalysts derived from metal organic frameworks for oxygen reduction reaction, *Nano Energy*, 2019, **61**, 60-68.
- 14 Z. Yang, Y. Wang, M. Zhu, Z. Li, W. Chen, W. Wei, T. Yuan, Y. Qu, Q. Xu, C. Zhao, X. Wang, P. Li, Y. Li, Y. Wu and Y. Li, Boosting Oxygen Reduction Catalysis with Fe-N<sub>4</sub> Sites Decorated Porous Carbons toward Fuel Cells, *ACS Catalysis*, 2019, **9**, 2158-2163.
- 15 L. Li, Y.-J. Chen, H.-R. Xing, N. Li, J.-W. Xia, X.-Y. Qian, H. Xu, W.-Z. Li, F.-X. Yin, G.-Y. He and H.-Q. Chen, Single-atom Fe-N<sub>5</sub> catalyst for high-performance zinc-air batteries, *Nano Research*, 2022, **15**, 8056-8064.
- 16 X. Wang, H. Zhu, C. Yang, J. Lu, L. Zheng and H.-P. Liang, Mesoporous carbon promoting the efficiency and stability of single atomic electrocatalysts for oxygen reduction reaction, *Carbon*, 2022, **191**, 393-402.
- 17 J.-C. Li, F. Xiao, H. Zhong, T. Li, M. Xu, L. Ma, M. Cheng, D. Liu, S. Feng, Q. Shi, H.-M. Cheng, C. Liu, D. Du, S. P. Beckman, X. Pan, Y. Lin and M. Shao, Secondary-Atom-Assisted Synthesis of Single Iron Atoms Anchored on N-Doped Carbon Nanowires for Oxygen Reduction Reaction, *ACS Catalysis*, 2019, **9**, 5929-5934.
- 18 X. Zhang, L. Truong-Phuoc, X. Liao, G. Tuci, E. Fonda, V. Papaefthymiou, S. Zafeirotos, G. Giambastiani, S. Pronkin and C. Pham-Huu, An Open Gate for High-Density Metal Ions in N-Doped Carbon Networks: Powering Fe-N-C Catalyst Efficiency in the Oxygen Reduction Reaction, *ACS Catalysis*, 2021, **11**, 8915-8928.
- 19 Y. Zhou, Y. Yu, D. Ma, A. C. Foucher, L. Xiong, J. Zhang, E. A. Stach, Q. Yue and Y. Kang, Atomic Fe Dispersed Hierarchical Mesoporous Fe-N-C Nanostructures for an Efficient Oxygen Reduction Reaction, *ACS Catalysis*, 2020, **11**, 74-81.
- 20 Y. Wang, Q. Li, L.-c. Zhang, Y. Wu, H. Chen, T. Li, M. Xu and S.-J. Bao, A gel-limiting strategy for large-scale fabrication of Fe-N-C single-atom ORR catalysts, *J. Mater. Chem. A*, 2021, **9**, 7137-7142.
- 21 D. Liu, J. C. Li, S. Ding, Z. Lyu, S. Feng, H. Tian, C. Huan, M. Xu, T. Li, D. Du, P. Liu, M. Shao and Y. Lin, 2D Single-Atom Catalyst with Optimized Iron Sites Produced by Thermal Melting of Metal-Organic Frameworks for Oxygen Reduction Reaction, *Small Methods*, 2020, **4**.
- 22 H. Liu, C. Wang, X. Ai, B. Wang, Y. Bian, G. Wang, Y. Wang, Z. Hu and Z. Zhang, Stabilizing iron single atoms with electrospun hollow carbon nanofibers as self-standing air-electrodes for long-time Zn-air batteries, *J. Colloid Interface Sci.*, 2023, **651**, 525-533.
- 23 L. Cao, X. Shi, Y. Li, X. Wang, L. Zheng and H.-P. Liang, Isolation anchoring strategy for in situ synthesis of iron single-atom catalysts towards long-term rechargeable zinc-air battery, *Carbon*, 2022, **199**, 387-394.

- 24 L. J. W. M.S. Liu, L. Zhang, Y. Zhao, K. Chen, Y.X. Li, X. Yang, In-situ silica xerogel assisted facile synthesis of Fe-N-C catalysts with dense Fe-N<sub>x</sub> active sites for efficient oxygen reduction, *Small*, 2021, **18**, 202104934.
- 25 W. Ye, S. Chen, Y. Lin, L. Yang, S. Chen, X. Zheng, Z. Qi, C. Wang, R. Long, M. Chen, J. Zhu, P. Gao, L. Song, J. Jiang and Y. Xiong, Precisely tuning the number of Fe atoms in clusters on N-doped carbon toward acidic oxygen reduction reaction, *Chem. Comm.*, 2019, **5**, 2865-2878.
- 26 M. Shen, J. Liu, J. Li, C. Duan, C. Xiong, W. Zhao, L. Dai, Q. Wang, H. Yang and Y. Ni, Breaking the N-limitation with N-enriched porous submicron carbon spheres anchored Fe single-atom catalyst for superior oxygen reduction reaction and Zn-air batteries, *Energy Stor. Mater.*, 2023, **59**.
- 27 Y. Wu, X. Wang, B. Tian, W. Shuang, Z. Bai and L. Yang, Optimizing reaction intermediate adsorption by engineering the coordination structure of single-atom Fe-N<sub>5</sub>-C electrocatalysts for efficient oxygen reduction, *Inorg. Chem. Front.*, 2023, **10**, 4209-4220.
- 28 X. Zhang, X. Han, Z. Jiang, J. Xu, L. Chen, Y. Xue, A. Nie, Z. Xie, Q. Kuang and L. Zheng, Atomically dispersed hierarchically ordered porous Fe-N-C electrocatalyst for high performance electrocatalytic oxygen reduction in Zn-Air battery, *Nano Energy*, 2020, **71**, 104547.
- 29 X. Wang, C. Yang, X. Wang, H. Zhu, L. Cao, A. Chen, L. Gu, Q. Zhang, L. Zheng and H.-P. Liang, Green synthesis of a highly efficient and stable single-atom Iron catalyst anchored on nitrogen-doped carbon nanorods for the oxygen reduction reaction, *ACS Sustain. Chem. Eng.*, 2020, **9**, 137-146.
- 30 X. Liu, X. Zhai, W. Sheng, J. Tu, Z. Zhao, Y. Shi, C. Xu, G. Ge and X. Jia, Isolated single iron atoms anchored on a N, S-codoped hierarchically ordered porous carbon framework for highly efficient oxygen reduction, *J. Mater. Chem. A*, 2021, **9**, 10110-10119.
- 31 H. Li, K. Du, C. Xiang, P. An, X. Shu, Y. Dang, C. Wu, J. Wang, W. Du, J. Zhang, S. Li, H. Tian, S. Wang and H. Xia, Controlled chelation between tannic acid and Fe precursors to obtain N, S co-doped carbon with high density Fe-single atom-nanoclusters for highly efficient oxygen reduction reaction in Zn-air batteries, *J. Mater. Chem. A*, 2020, **8**, 17136-17149.
- 32 H. Xu, L. Xiao, P. Yang, X. Lu, L. Liu, D. Wang, J. Zhang and M. An, Solvent environment engineering to synthesize Fe N C nanocubes with densely Fe-N<sub>x</sub> sites as oxygen reduction catalysts for Zn-air battery, *J. Colloid Interface Sci.*, 2023, **638**, 242-251.
- 33 L. Zhong, C. Jiang, M. Zheng, X. Peng, T. Liu, S. Xi, X. Chi, Q. Zhang, L. Gu, S. Zhang, G. Shi, L. Zhang, K. Wu, Z. Chen, T. Li, M. Dahbi, J. Alami, K. Amine and J. Lu, Wood carbon based single-atom catalyst for rechargeable Zn-air batteries, *ACS Energy Lett.*, 2021, **6**, 3624-3633.

- 34 Y. Jia, F. Zhang, Q. Liu, J. Yang, J. Xian, Y. Sun, Y. Li and G. Li, Single-atomic Fe anchored on hierarchically porous carbon frame for efficient oxygen reduction performance, *Chinese Chem. Lett.*, 2022, **33**, 1070-1073.
- 35 L. Li, Y.-J. Chen, H.-R. Xing, N. Li, J.-W. Xia, X.-Y. Qian, H. Xu, W.-Z. Li, F.-X. Yin, G.-Y. He and H.-Q. Chen, Single-atom Fe-N<sub>5</sub> catalyst for high-performance zinc-air batteries, *Nano Res.*, 2022, **15**, 8056-8064.
- 36 T. Chen, J. Wu, C. Zhu, Z. Liu, W. Zhou, C. Zhu, C. Guan and G. Fang, Rational design of iron single atom anchored on nitrogen doped carbon as a high-performance electrocatalyst for all-solid-state flexible zinc-air batteries, *Chem. Eng. J.*, 2021, **405**, 125956.
- 37 C. Xu, Y. Si, B. Hu, X. Xu, B. Hu, Y. Jiang, H. Chen, C. Guo, H. Li and C. Chen, Promoting oxygen reduction via crafting bridge-bonded oxygen ligands on a single-atom iron catalyst, *Inorg. Chem. Front.*, 2022, **9**, 3306-3318.
